# Supplementary material
Source: PubMed Central journal article supplement (PMC4804752)
Supplement: NIHMS760732-supplement.pdf [file NIHMS760732-supplement.pdf]

1

Supplementary Material for

2 Wave Energy Level and Geographic Setting Correlate with Florida Beach Water Quality

3 Zhixuan Feng\* <sup>1,2,3</sup>, Ad Reniers <sup>1,2,4</sup>, Brian K. Haus <sup>1,2</sup>, Helena M. Solo-Gabriele <sup>2,5</sup>,  
4 and Elizabeth A. Kelly <sup>2,6</sup>

5 1. Department of Ocean Sciences, Rosenstiel School of Marine and Atmospheric Science,  
6 University of Miami, 4600 Rickenbacker Causeway, Miami, Florida 33149, USA

7 2. NSF NIEHS Oceans and Human Health Center, Rosenstiel School of Marine and  
8 Atmospheric Science, University of Miami, 4600 Rickenbacker Causeway, Miami,  
9 Florida 33149, USA

10 3. Biology Department, Woods Hole Oceanographic Institution, Woods Hole,  
11 Massachusetts 02543, USA

12 4. Department of Hydraulic Engineering, Environmental Fluid Mechanics Section, Delft  
13 University of Technology, Stevinweg 1, 2628CN, Delft, The Netherlands.

14 5. Department of Civil, Architectural, and Environmental Engineering, College of  
15 Engineering, 1251 Memorial Drive, University of Miami, Coral Gables, Florida 33146,  
16 USA

17 6. Leonard and Jayne Abess Center for Ecosystem Science and Policy, University of  
18 Miami, Coral Gables, Florida 33146, USA

19 *Marine Pollution Bulletin*

20 \*Corresponding author:

21 Zhixuan Feng,

22 Contact information: Biology Department, Woods Hole Oceanographic Institution, MS  
23 #33, Redfield 2-44, Woods Hole, MA 02543, USA; phone: (+1) 508-289-3780; email:  
24 [zfeng@whoi.edu](mailto:zfeng@whoi.edu)

25

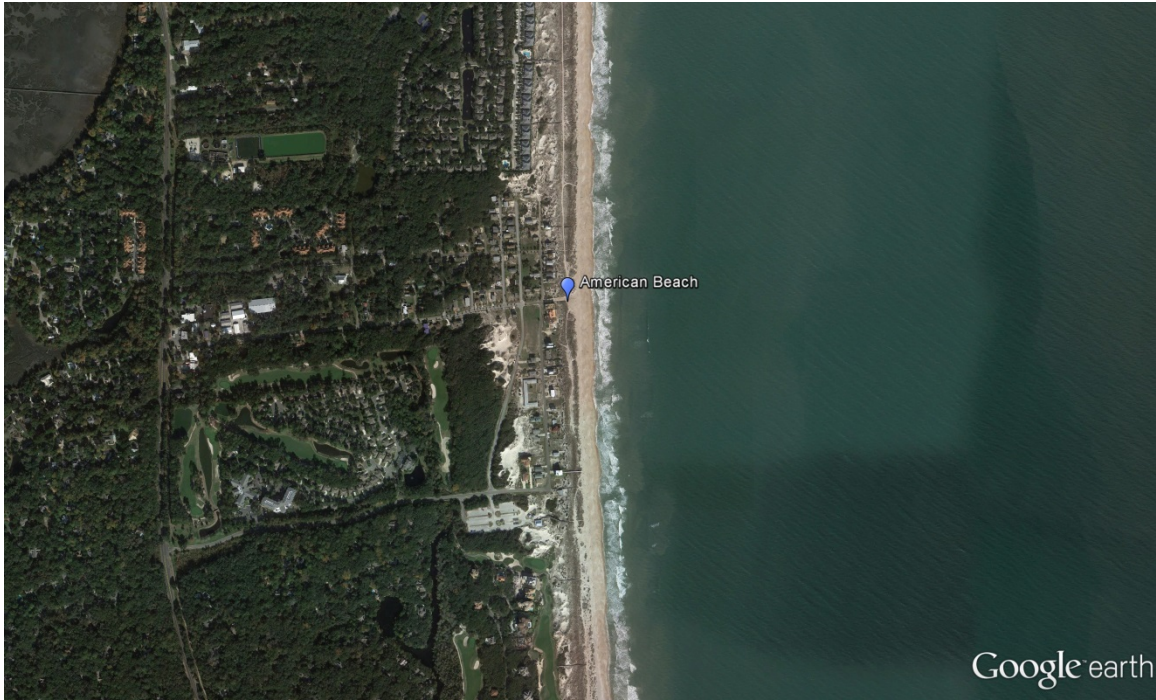

26

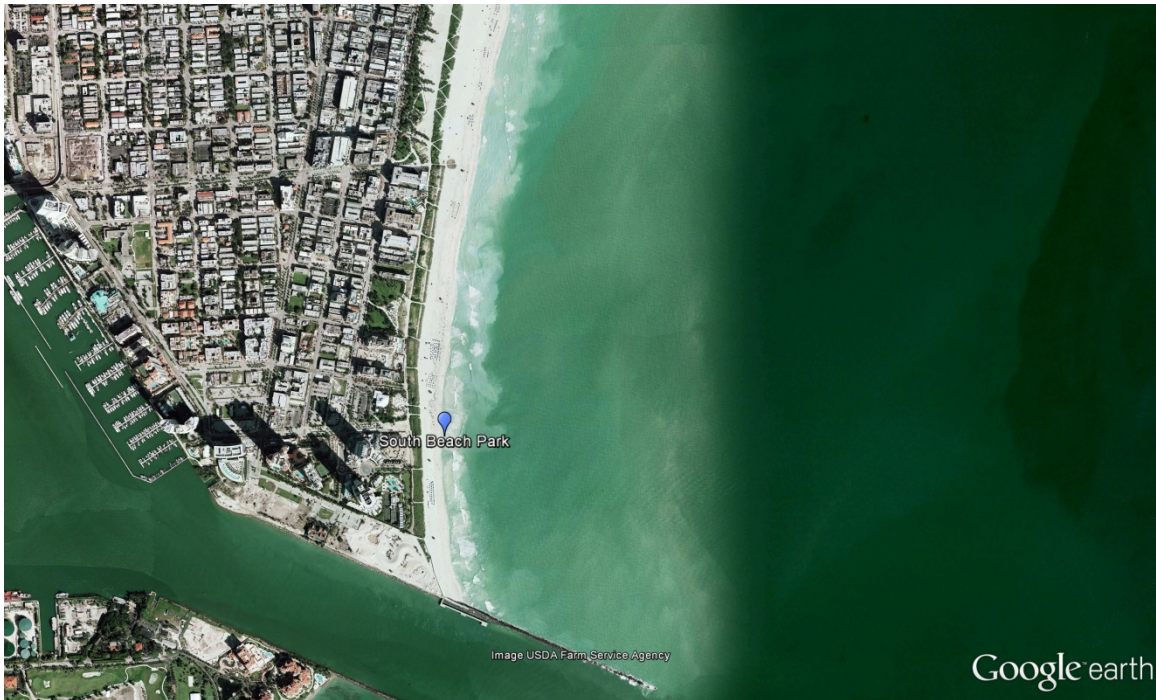

27 Figure S1 Google earth images of two representative high-wave-energy beaches. The  
28 upper one is American Beach in Nassau County and the lower one is South Beach in  
29 Miami-Dade County. Surfzone wave breaking near the beach shoreline, shown as long  
30 and straight white bands, can be easily identified from the images.

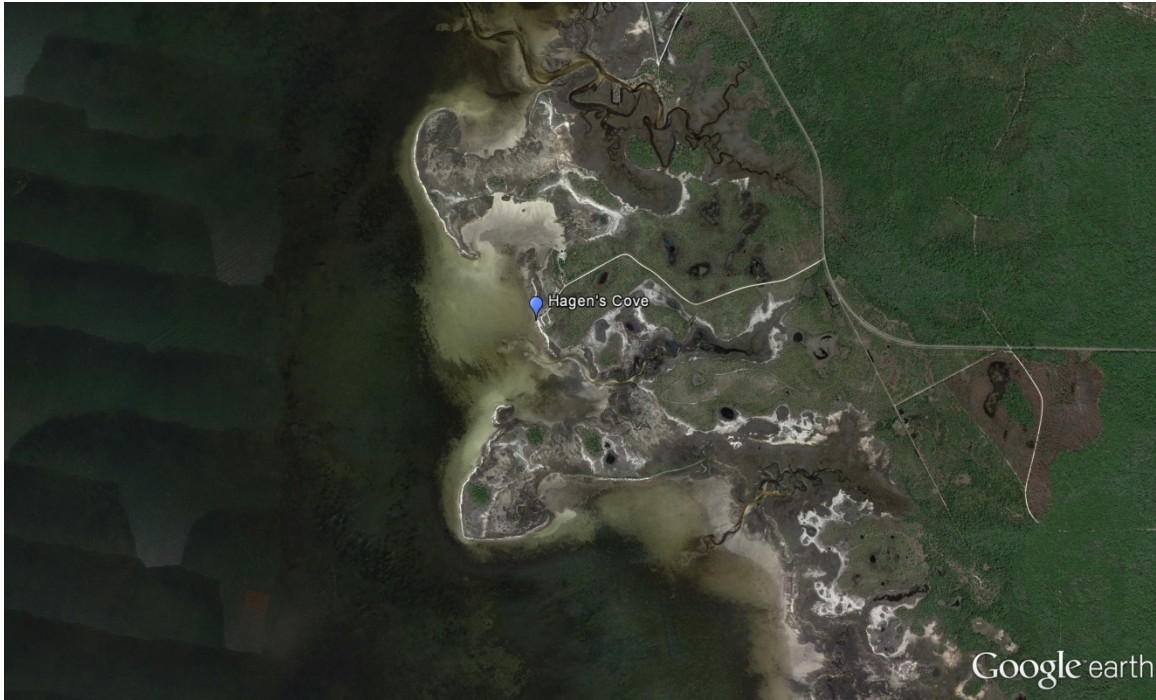

31

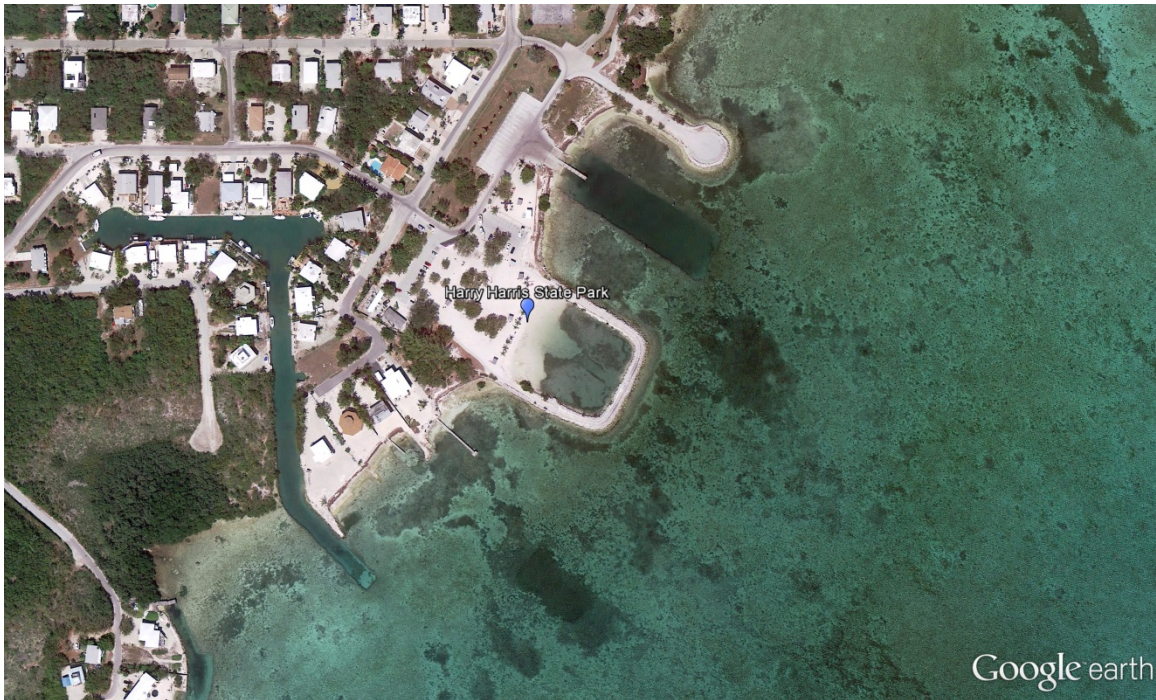

32

33 Figure S2 Google Earth images of two representative low-wave-energy beaches. The  
34 upper one is Hagen's Cove Beach in Taylor County, which is located in the Big Bend  
35 area surrounded by salt marshes. The lower one is Harry Harris County Park in Monroe  
36 County, which is fully protected by a coral rock barrier.

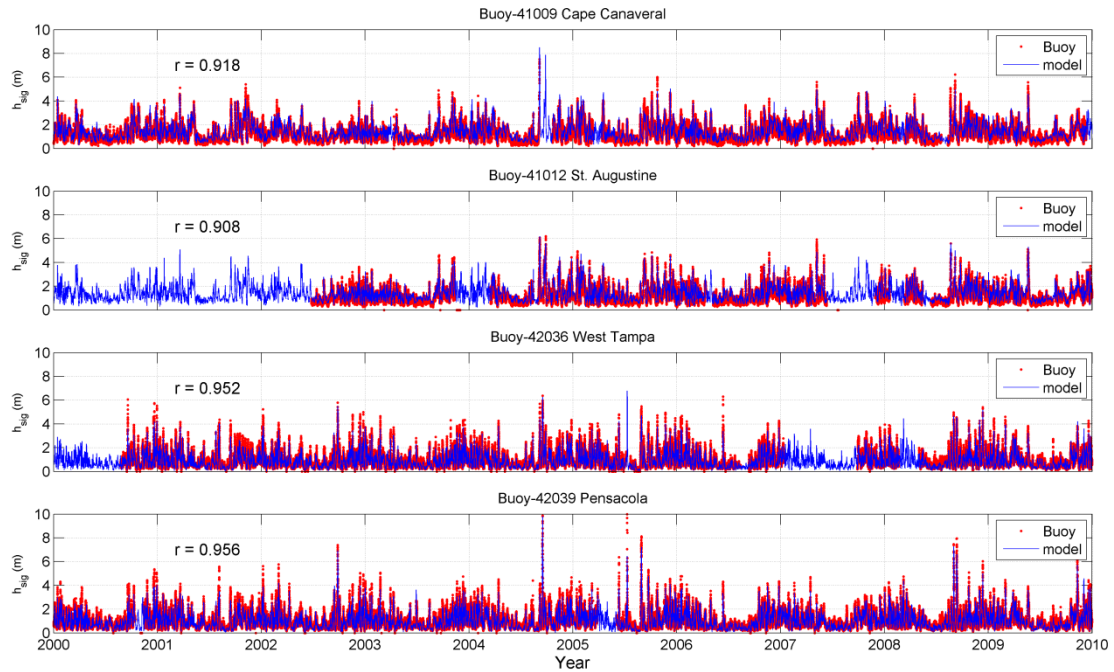

37

38 Figure S3 Comparisons of significant wave height between WAVEWATCH-III hindcasts  
39 and buoy observations at four NDBC stations from 2000 to 2009. (a) Buoy-41009 Cape  
40 Canaveral; (b) Buoy-41012 St. Augustine; (c) Buoy-42036 West Tampa; and (d) Buoy-  
41 42039 Pensacola. Data gaps exist in the observations (red dots). Model outcomes and  
42 observations agree well with correlation coefficients all above 0.9.  
43

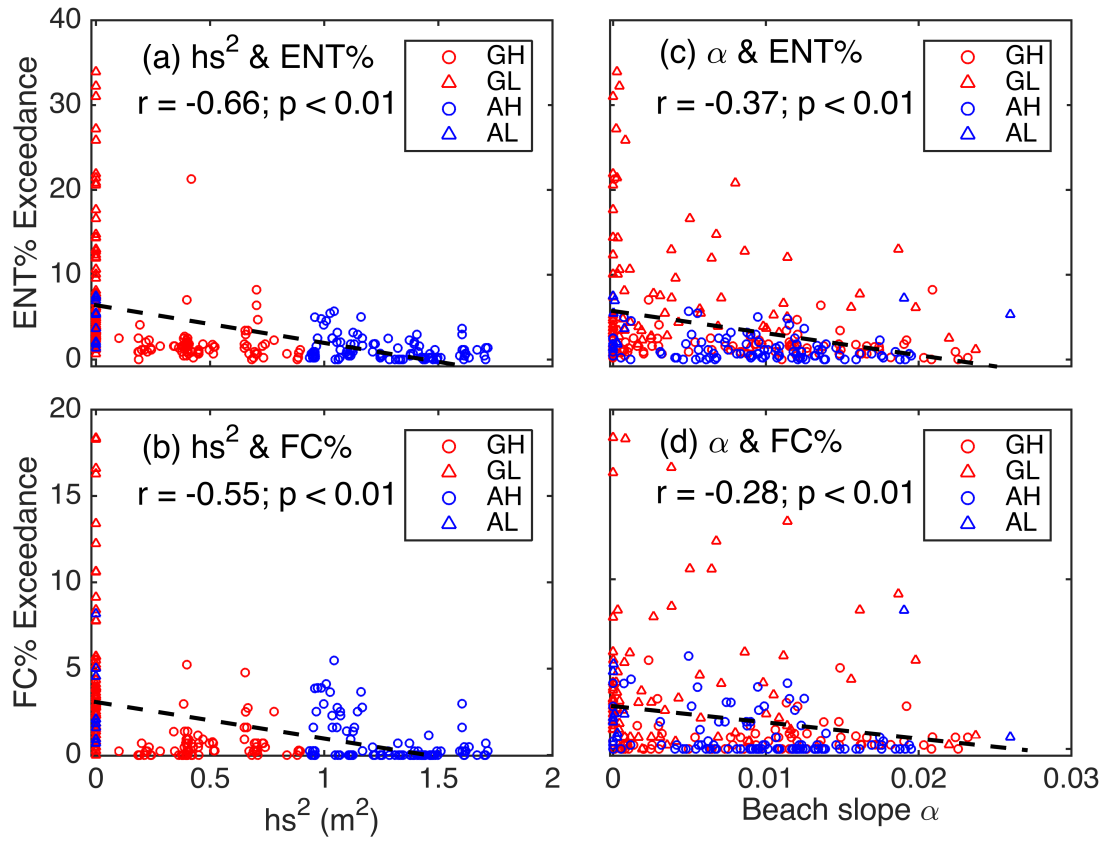

44

45 Figure S4. Scatterplots of enterococci (upper panels) and fecal coliform (lower panels)  
 46 percent exceedances against mean squared significant wave height  $h_s^2$  (left panels) and  
 47 beach slope  $\alpha$  (right panels). The dash line in each panel is a curve least-squared fitted to  
 48 data of all 262 beaches. GH: GoM high-wave-energy, GL: GoM low-wave-energy, AH:  
 49 Atlantic high-wave-energy, and AL: Atlantic low-wave-energy.
